# Supplementary material for: Melanoma cells undergo aggressive coalescence in a 3D Matrigel model that is repressed by anti-CD44
Source: PubMed Central journal article supplement (PMC5338862; doi:10.1371/journal.pone.0173400), 2017-03-06
Supplement: pone.0173400.s005.pdf [file pone.0173400.s005.pdf]

**S1 Table. mAbs used to stain cells for melanoma phenotype.**

| Antibody               | Antigen                         | Antigen specimen | Antibody Characterization |    |     |      |      |       |    |      |         |    |
|------------------------|---------------------------------|------------------|---------------------------|----|-----|------|------|-------|----|------|---------|----|
|                        |                                 |                  | WB                        | IP | IHC | IF   | FACS | ELISA | FB | FFPE | Epitope | MA |
| CPTC-MageA4-3 (DSHB)   | Melanoma Antigen Family A, 4    | human            | +                         |    |     | t.s. |      |       | +  |      |         |    |
| CPTC-S100A4-1 (DSHB)   | S100 calcium binding protein A2 | human            | +                         |    |     |      | t.s. |       |    | +    |         |    |
| CP28 (Calbiochem(AS02) | anti-fibroblast/ CD90/Thy-1     | human            | +                         | +  | +   | +    | +    | +     |    |      |         |    |
| HMB45 (Dako)           | Pme117                          | human            | -                         |    | +   | +    |      |       |    |      |         |    |

\*ts, this study
