# Supplementary material for: Melanoma cells undergo aggressive coalescence in a 3D Matrigel model that is repressed by anti-CD44
Source: PubMed Central journal article supplement (PMC5338862; doi:10.1371/journal.pone.0173400), 2017-03-06
Supplement: pone.0173400.s006.pdf [file pone.0173400.s006.pdf]

|                        |                                                           |                                              |   |   |   |   |    |   |   |
|------------------------|-----------------------------------------------------------|----------------------------------------------|---|---|---|---|----|---|---|
| EMA-1 supernatant      | Primordial germ cell surface marker                       | human                                        | - | + | + |   |    |   |   |
| F461.3B purified       | Notch, extracellular domain, EGF repeats #5-7             | Drosophila no information on test on human   | - | + |   |   | +  |   |   |
| G1/221/12 purified     | transferrin receptor                                      | human                                        | - | + | + | + |    |   |   |
| HB#7 purified          | CD133/ Prominin-1                                         | human                                        | - | + |   | + | +  | + |   |
| H36 purified           | p46 cell surface protein excluded from macropinocytic cup | D.discoideum no information on test on human | - | + | + | + |    |   |   |
| H4C4 purified          | CD44                                                      | human                                        | + | + |   |   | ts | + | + |
| H5A4 purified          | CD11b                                                     | human                                        | - |   |   |   |    |   |   |
| H5C6 : H5C6-s purified | CD63 (human) LAMP                                         | human                                        | - | + |   |   |    |   |   |
| MAb83F6 supernatant    | TRP protein (transient receptor potential)                | Drosophila no information on test on human   | - | + |   | + |    |   | + |
| MAb83F6 purified       | TRP protein (transient receptor potential)                | Drosophila no information on test on human   | - | + |   | + |    |   | + |
| MRN2 2B7 purified      | mineralocorticoid receptor                                | rat no information on test on human          | - | + |   | + |    |   |   |
| MRN3 3F10 purified     | mineralocorticoid receptor                                | rat no information on test on human          | - |   |   |   | +  |   |   |
| MC-480 supernatant     | SSEA-1/ alpha-(1,3)-fucosyltransferase / CD15             | human                                        | - | + | + | + | +  | + | + |
| MC-480 purified        | SSEA-1/ alpha-(1,3)-fucosyltransferase / CD15             | human                                        | - | + | + | + | +  | + | + |
| MC-631 purified        | SSEA-3                                                    | human                                        | - |   |   |   | +  |   |   |
| MC-813 supernatant     | SSEA-4                                                    | human                                        | - | + |   | + | +  | + | + |
| MHM.24 purified        | CD11a (LFA-1, alpha subunit),human                        | human                                        | - | + | + | + |    |   | + |

|                          |                                                                             |                                          |               |   |   |   |   |   |   |
|--------------------------|-----------------------------------------------------------------------------|------------------------------------------|---------------|---|---|---|---|---|---|
| MPIIB10(1) purified      | osteopontin                                                                 | human                                    | -             | + | + |   |   |   |   |
| PCRP-ESRRA-1B10 purified | PCRP-ESRRA-1B10                                                             | human                                    | -             | + | + |   |   |   | + |
| PCRP-ESRRG-3A6 purified  | ESRRG; Estrogen-related receptor gamma                                      | human                                    | -             |   | + |   |   |   | + |
| PCRP-ING1-1C2            | Inhibitor of growth family, member 1                                        | human                                    | -             | + |   |   |   |   | + |
| PCRP-RORA-2C2 purified   | RORA; RAR-related orphan receptor A                                         | human                                    | -             |   | + |   |   |   | + |
| PCRP-RXRA-2A8 purified   | RXRA; Retinoid X receptor, alpha                                            | human                                    | -             |   | + |   |   |   | + |
| PCRP-RXRG-5C9 purified   | Retinoid X receptor, gamma                                                  | human                                    | -             |   | + |   |   |   | + |
| P1E6                     | integrin alpha-2                                                            | human                                    | -             | + | + | + | + |   | + |
| P1F6 purified            | integrin alpha V/5 + beta 5 (CD49e, CD51, fibronectin/vitronectin receptor) | human                                    | -             |   | + | + |   | + | + |
| P3H9                     | laminin 5                                                                   | human                                    | -             | + | + |   | + | + | + |
| P4H9                     | integrin beta-2 (CD18)                                                      | human                                    | -             |   | + | + | + |   | + |
| P2C62C4 purified         | integrin alpha-6 (avian)                                                    |                                          | <b>slight</b> | + | + |   |   |   |   |
| QH 1 purified            | Quail endothelial cell surface                                              | Quail no information on test on human    | -             |   | + | + |   |   |   |
| rMR1-18 1D5n purified    | mineralocorticoid receptor                                                  | human                                    | -             | + | + | + |   |   |   |
| SM 1.2 purified          | somatomedin-C; Sm-C/IGF-1                                                   | human                                    | -             | + | + |   |   | + | + |
| STRO-1 purified          | stromal cell surface marker                                                 | human                                    | -             |   |   |   | + | + |   |
| VD2(1)B12 purified       | DHPR beta subunit, skeletal muscle                                          | human                                    | -             | + | + | + |   |   |   |
| 151-IgG purified         | Epidermal growth factor receptor                                            | rat, no information on test on human     | -             | + | + |   |   |   |   |
| 1D10 purified            | CD44                                                                        | chicken, no information on test on human | -             | + | + | + |   |   |   |

|                     |                                                        |                                             |   |   |   |   |   |
|---------------------|--------------------------------------------------------|---------------------------------------------|---|---|---|---|---|
| 5.1H11 purified     | NCAM                                                   | human                                       | - |   |   |   | + |
| 7D6 purified        | L-CAM                                                  | chicken, does not react with mammals        | - |   | + | + |   |
| 8.1.1 purified      | Podoplanin                                             | mouse, no information on test on human      | - | + |   | + | + |
| 8B4D2 MH2B purified | Glutamate receptor subunit, DGluR-IIA                  | Drosophila, no information on test on human | - |   | + |   | + |
| 8B22F5 purified     | protein tyrosine phosphatase, receptor-linked, DPTP10D | Drosophila, no information on test on human | - |   | + | + | + |
| 8H9 purified        | CD64/FcgRI                                             | human                                       | - |   |   |   | + |

---
